# Supplementary material
Source: publisher figshare collection journal article supplement (https://acs.figshare.com/ndownloader/files/15112751)
Supplement: Supplementary file 1 [file 15112751]

# Supporting Information for TASBE Flow Analytics: A Package for Calibrated Flow Cytometry Analysis

Jacob Beal,<sup>\*,†</sup> Cassandra Overney,<sup>‡,†</sup> Aaron Adler,<sup>†</sup> Fusun Yaman,<sup>†</sup> Lisa Tiberio,<sup>†</sup>  
and Meher Samineni<sup>¶,†</sup>

<sup>†</sup>*Raytheon BBN Technologies*

<sup>‡</sup>*Olin College*

<sup>¶</sup>*University of Utah*

E-mail: [jakebeal@ieee.org](mailto:jakebeal@ieee.org)

Table S1: Feature comparison between free and open calibrated flow cytometry tools: TASBE Flow Analytics, FlowCal, and CytoFlow.

| Feature<br>(as of version evaluated)   | TASBE Flow Analytics<br>7.6 | CytoFlow<br>1.0 | FlowCal<br>1.2.1 |
|----------------------------------------|-----------------------------|-----------------|------------------|
| License                                | Permissive Usage            | GPL             | Permissive       |
| Matlab / Octave                        | Yes                         | No              | No               |
| Python / Jupyter                       | via Oct2Py                  | Yes             | Yes              |
| Excel interface                        | Yes                         | No              | Yes              |
| Point and click UI                     | No                          | Yes             | No               |
| FCS import                             | Yes                         | Yes             | Yes              |
| CSV import                             | Yes                         | Yes             | No               |
| Automatic gating                       | Yes                         | Yes             | Yes              |
| Fluorescence unit calibration          | Yes                         | Yes             | Yes              |
| Size unit calibration                  | Yes                         | No              | No               |
| Built-in bead catalog                  | Yes                         | Partial         | No               |
| Autofluorescence correction            | Yes                         | Yes             | No               |
| Spectral overlap compensation          | Yes                         | Yes             | No               |
| Channel-to-channel unit conversion     | Yes                         | Yes             | No               |
| High-throughput analysis templates     | Yes                         | Yes             | Yes              |
| Bulk statistics                        | Yes                         | Yes             | Yes              |
| Histogram analysis                     | Yes                         | Yes             | Yes              |
| Gaussian mixture model analysis        | Yes                         | Yes             | No               |
| Parametric analysis                    | Yes                         | Yes             | No               |
| Plus/minus comparative analysis        | Yes                         | No              | No               |
| Signal-to-noise ratio analysis         | Yes                         | No              | No               |
| Excluded data analysis                 | Yes                         | No              | No               |
| High-throughput exception architecture | Yes                         | No              | Yes              |
| Metadata validation                    | Yes                         | No              | Yes              |
| Machine-readable analysis logs         | Yes                         | No              | No               |
| Load/save configuration state          | Yes                         | No              | No               |
| Continuous integration & testing       | Yes                         | Yes             | No               |
